# Supplementary material for: The North American mitochondrial disease registry
Source: PubMed Central journal article supplement (PMC7323997; doi:10.20517/jtgg.2020.12), 2020-04-28
Supplement: NIHMS1589101-supplement-supplementary_materials.pdf [file NIHMS1589101-supplement-supplementary_materials.pdf]

**Supplemental Tables/Figures**

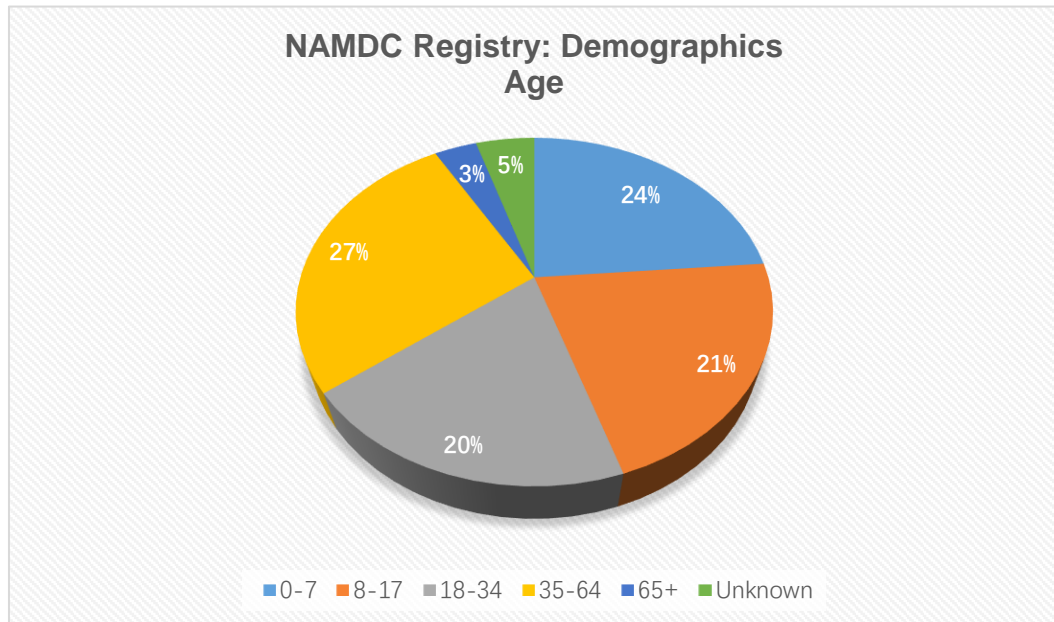

Figure S1. NAMDC Registry Participants by Age group.

Table S1. NAMDC Registry Participants by Ethnicity

|                            | Females     | Males       | Unknown   | Total         |
|----------------------------|-------------|-------------|-----------|---------------|
| <b>Not Hispanic/Latino</b> | 795 (48.3%) | 583 (35.4%) | 0 (0.0%)  | 1378          |
| <b>Hispanic/Latino</b>     | 109 (6.6%)  | 81 (4.9%)   | 0 (0.0%)  | 190           |
| <b>Not yet reported</b>    | 0 (0.0%)    | 0 (0.0%)    | 79 (4.8%) | 79            |
| <b>Total</b>               | 904 (54.9%) | 664 (40.3%) | 79 (4.8%) | 1647 (100.0%) |

Table S1. NAMDC Registry Participants by Race

|                                       | Females     | Males       | Unknown   | Total         |
|---------------------------------------|-------------|-------------|-----------|---------------|
| <b>American Indian/ Alaska Native</b> | 4 (0.2%)    | 6 (0.4%)    | 0 (0.0%)  | 10(0.6%)      |
| <b>Asian</b>                          | 22 (1.3%)   | 23 (1.4%)   | 0 (0.0%)  | 45(2.7%)      |
| <b>Native Hawaiian/Pacific Island</b> | 4(0.2%)     | 1(0.1%)     | 0 (0.0%)  | 5(0.3%)       |
| <b>Black/African American</b>         | 24 (1.5%)   | 16(1.0%)    | 0 (0.0%)  | 40(2.4%)      |
| <b>White</b>                          | 787 (47.8%) | 554(33.6%)  | 0 (0.0%)  | 1341(81.4%)   |
| <b>More than one</b>                  | 16 (1.0 %)  | 30 (1.8%)   | 0 (0.0%)  | 46(2.8%)      |
| <b>Other</b>                          | 47 (2.9%)   | 34(2.1%)    | 0 (0.0%)  | 81(4.9%)      |
| <b>Not yet reported</b>               | 0 (0.0%)    | 0 (0.0%)    | 79 (4.8%) | 79(4.8 %)     |
| <b>Total</b>                          | 904 (54.9%) | 664 (40.3%) | 79 (4.8%) | 1647 (100.0%) |
